# Supplementary material for: The SIX1/LDHA Axis Promotes Lactate Accumulation and Leads to NK Cell Dysfunction in Pancreatic Cancer
Source: Hindawi journal article supplement (doi:10.1155/2023/6891636), 2023-03-08

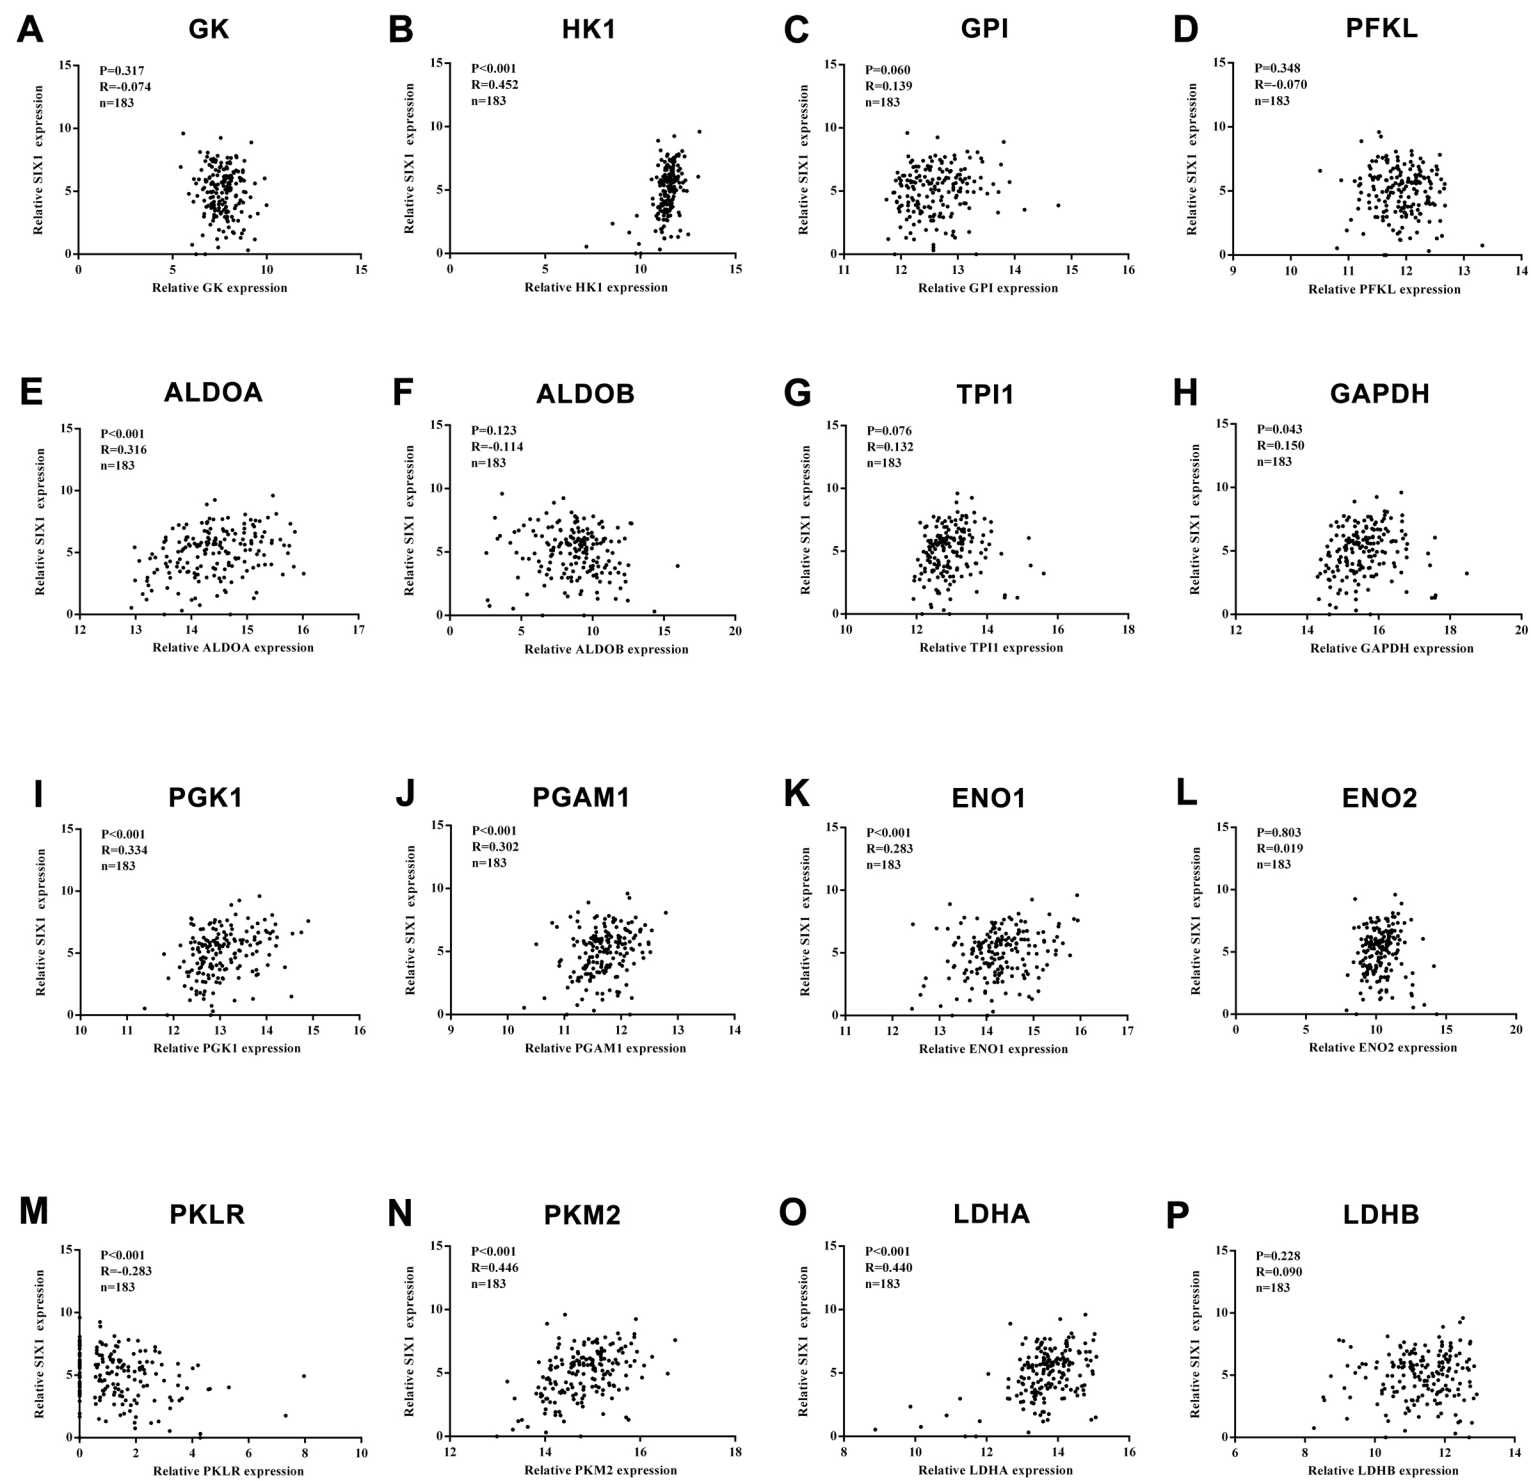

Supplement: f1 [file 6891636.f1.pdf]
